# Supplementary material
Source: PubMed Central journal article supplement (PMC8940208)
Supplement: mmc1.pdf [file mmc1.pdf]

# THE LANCET

## Digital Health

### Supplementary appendix

This appendix formed part of the original submission and has been peer reviewed. We post it as supplied by the authors.

Supplement to: Alboksmaty A, Beaney T, Elkin S, et al. Effectiveness and safety of pulse oximetry in remote patient monitoring of patients with COVID-19: a systematic review. *Lancet Digit Health* 2022; **4**: e279–89.

## Appendices

### Appendix-1: Search strategy

#### Appendix 1: search strategy, MeSH terms and keywords for the included databases

| Database                                    |            | Search strategy                                                                                                                                                                                                                                                                                                                                                                                                                                                                                                                                                                                                                                                                                                                        |
|---------------------------------------------|------------|----------------------------------------------------------------------------------------------------------------------------------------------------------------------------------------------------------------------------------------------------------------------------------------------------------------------------------------------------------------------------------------------------------------------------------------------------------------------------------------------------------------------------------------------------------------------------------------------------------------------------------------------------------------------------------------------------------------------------------------|
| <b>Medline</b><br>(via OVID)                |            | <b>COVID</b><br>((*coronavirus infections/ or severe acute respiratory syndrome/ or *betacoronavirus/ or sars virus/ or exp Coronavirus/ or Respiratory Distress Syndrome, Adult/ or Pneumonia, Viral/ or Coronavirus Infections/bl)<br>AND<br>(*epidemics/ or pandemics/ or exp disease outbreaks/ or contact tracing/ or *data collection/ or disease notification/ or epidemiological monitoring/ or epidemic* or pandemic* or outbreak*))<br>OR<br>(*coronavirus Infections/di or Coronavirus Infections/ep<br>Or covid19 or covid 19 or nCoV or novel CoV or Cov19 or cov 19 or CoV2 or CoV 2 or 2019CoV or 2019 CoV or 2019nCoV or wuhan virus or sarscov2 or coronavir* or corona virus* or betacoronavir* or novel coronavir*) |
|                                             | <b>AND</b> | <b>Oximetry</b><br>exp oximetry/ or blood gas monitoring, transcutaneous/<br>OR<br>(Oximet*3 or oxygen saturation monitor*3).mp.                                                                                                                                                                                                                                                                                                                                                                                                                                                                                                                                                                                                       |
| <b>Embase</b><br>(via OVID)                 |            | <b>COVID</b><br>((exp pandemic/ or exp pandemic influenza/ or exp pandemic/ or exp pandemic influenza/ or coronavirus infection/ or coronaviridae infection/ or severe acute respiratory syndrome/ or exp pneumonia/ or lung disease/)<br>AND<br>(pandemic/ or exp epidemic/ or epidemic* or pandemic* or outbreak*))<br>OR<br>(covid19 or covid 19 or nCoV or novel CoV or Cov19 or cov 19 or CoV2 or CoV 2 or 2019CoV or 2019 CoV or 2019nCoV or wuhan virus or sarscov2 or coronavir* or corona virus* or betacoronavir* or novel coronavir*)                                                                                                                                                                                       |
|                                             | <b>AND</b> | <b>Oximetry</b><br>(pulse oximeter/ or pulse oximetry/ or oximetry/)<br>OR<br>(Oximet*3 or oxygen saturation monitor*3).mp.                                                                                                                                                                                                                                                                                                                                                                                                                                                                                                                                                                                                            |
| <b>Global Health</b><br>(via OVID)          |            | <b>COVID</b><br>(results: 17,662)<br>((exp severe acute respiratory syndrome/ or exp severe acute respiratory syndrome coronavirus/ or exp severe acute respiratory syndrome-related coronavirus/ or coronaviridae/ or coronavirinae/)<br>AND<br>(exp pandemics/ or exp epidemics/ or exp outbreaks/ or spread/ or disease distribution/ or epidemic* or pandemic* or outbreak*))<br>OR<br>(covid19 or covid 19 or nCoV or novel CoV or Cov19 or cov 19 or CoV2 or CoV 2 or 2019CoV or 2019 CoV or 2019nCoV or wuhan virus or sarscov2 or coronavir* or corona virus* or betacoronavir* or novel coronavir*)                                                                                                                           |
|                                             | <b>AND</b> | <b>Remote monitoring</b><br>(results: 633)<br>oximet* or oxygen monitor* or oxygen saturation monitor*                                                                                                                                                                                                                                                                                                                                                                                                                                                                                                                                                                                                                                 |
| <b>MedRxiv &amp; BioRxiv</b><br>(preprints) | <b>AND</b> | (COVID-19 or SARS-CoV-2)<br><br>(oximeter or oximetry)                                                                                                                                                                                                                                                                                                                                                                                                                                                                                                                                                                                                                                                                                 |
